# Supplementary material for: Development of clinically relevant in vivo metastasis models using human bone discs and breast cancer patient-derived xenografts
Source: PubMed Central journal article supplement (PMC6884811; doi:10.1186/s13058-019-1220-2), 2019-11-29

Figure S1

Intraductal injection of T47D cells into female NOD SCID mice 4-weeks after human bone graft

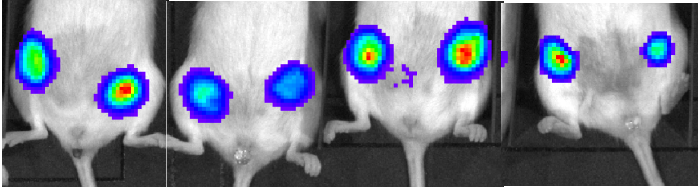

Remove primary tumour  
4-5 weeks after injection

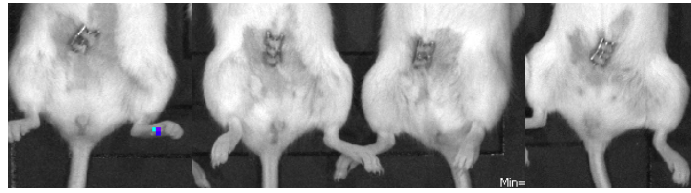

8 weeks after tumour resection metastases  
detected in human and mouse bone

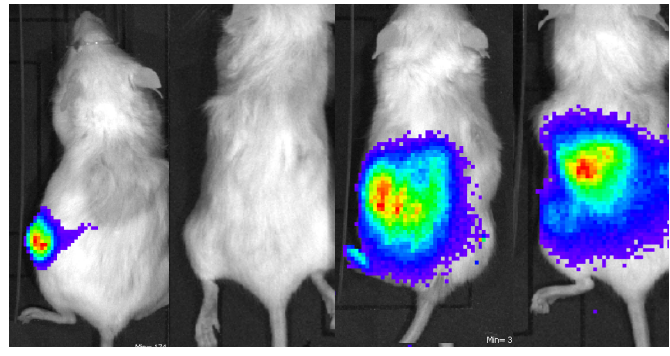

Human bone implants

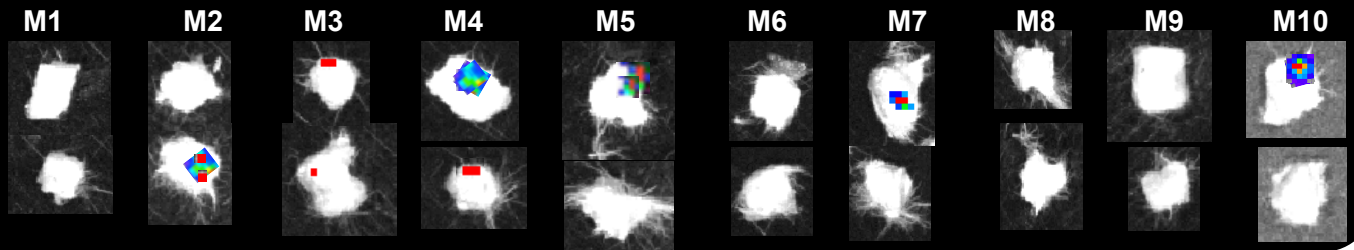

Mouse tibiae/femurs

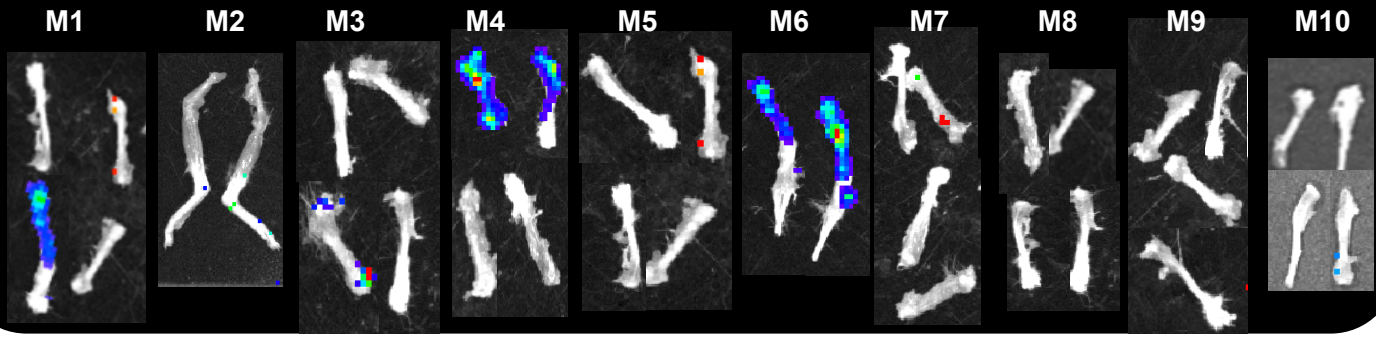

Supplement: 13058_2019_1220_MOESM1_ESM.pdf [file 13058_2019_1220_MOESM1_ESM.pdf]
